# Supplementary material for: Ferroportin and FBXL5 as Prognostic Markers in Advanced Stage Clear Cell Renal Cell Carcinoma
Source: PubMed Central journal article supplement — Cancer Res Treat. 2021 Mar 17;53(4):1174–83. doi: 10.4143/crt.2021.031 (PMC8524006; doi:10.4143/crt.2021.031), 2021-03-17
Supplement: crt-2021-031_S1_Table.pdf [file crt-2021-031_S1_Table.pdf]

**S1 Table.** Patient and tumor characteristics of the two clear cell RCC cohorts

| Variable                             | TCGA KIRC cohort | Severance hospital cohort |
|--------------------------------------|------------------|---------------------------|
| No. of samples                       | 534              | 143                       |
| Median age (yr)                      | 61               | 60                        |
| Sex                                  |                  |                           |
| Male                                 | 346              | 103                       |
| Female                               | 188              | 40                        |
| WHO/ISUP nuclear grade <sup>a)</sup> |                  |                           |
| 1                                    | 14               |                           |
| 2                                    | 229              | 25                        |
| 3                                    | 207              | 79                        |
| 4                                    | 76               | 39                        |
| Pathologic tumor stage               |                  |                           |
| pT1                                  | 274              |                           |
| pT2                                  | 69               |                           |
| pT3                                  | 180              | 139                       |
| pT4                                  | 11               | 4                         |
| Adjuvant treatment                   |                  |                           |
| None                                 | N/A              | 66                        |
| VEGFR-TKI                            | N/A              | 67                        |
| Others                               | N/A              | 10                        |
| FPN mRNA level                       |                  |                           |
| Low                                  | 267              | N/A                       |
| High                                 | 267              | N/A                       |
| FPN IHC expression                   |                  |                           |
| Low                                  | N/A              | 71                        |
| High                                 | N/A              | 72                        |
| FBXL5 mRNA level                     |                  |                           |
| Low                                  | 267              | N/A                       |
| High                                 | 267              | N/A                       |
| FBXL5 IHC expression                 |                  |                           |
| Low                                  | N/A              | 85                        |
| High                                 | N/A              | 58                        |
| Recurrence/Metastasis <sup>b)</sup>  |                  |                           |
| Absent                               | 309              | 54                        |
| Present                              | 127              | 89                        |
| Survival status                      |                  |                           |
| Alive                                | 359              | 86                        |
| Expired                              | 175              | 57                        |

FBXL5, F-box and leucine rich repeat protein 5; FPN, ferroportin; KIRC, kidney renal clear cell carcinoma; RCC, renal cell carcinoma; TCGA, The Cancer Genome Atlas; TKI, tyrosine kinase inhibitor; VEGFR, vascular endothelial growth factor receptor. <sup>a)</sup>Nuclear grade for TCGA KIRC cohort was available in 526 cases, <sup>b)</sup>Recurrence or distant metastasis data for TCGA KIRC cohort was available in 436 cases.
