# Supplementary material for: Ferroportin and FBXL5 as Prognostic Markers in Advanced Stage Clear Cell Renal Cell Carcinoma
Source: PubMed Central journal article supplement — Cancer Res Treat. 2021 Mar 17;53(4):1174–83. doi: 10.4143/crt.2021.031 (PMC8524006; doi:10.4143/crt.2021.031), 2021-03-17
Supplement: crt-2021-031_S2_Fig.pdf [file crt-2021-031_S2_Fig.pdf]

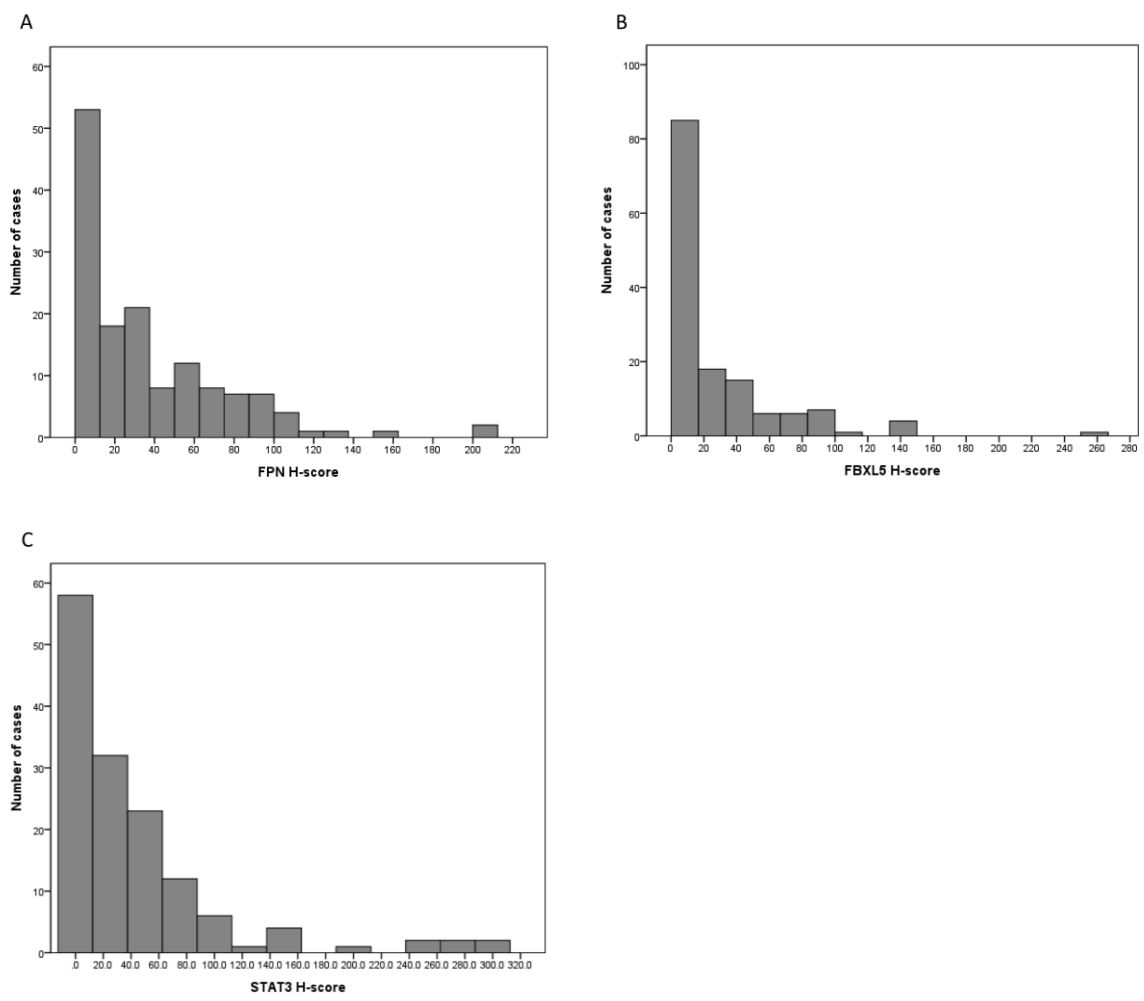

**S2 Fig.** The distribution of H-score of ferroportin (FPN), F-Box and leucine rich repeat protein 5 (FBXL5), and signal transducer and activator of transcription 3 (STAT3).
