# Supplementary material for: Ferroportin and FBXL5 as Prognostic Markers in Advanced Stage Clear Cell Renal Cell Carcinoma
Source: PubMed Central journal article supplement — Cancer Res Treat. 2021 Mar 17;53(4):1174–83. doi: 10.4143/crt.2021.031 (PMC8524006; doi:10.4143/crt.2021.031), 2021-03-17
Supplement: crt-2021-031_S3_Table.pdf [file crt-2021-031_S3_Table.pdf]

**S3 Table.** Clinicopathological characteristics of 534 cases of TCGA KIRC cohort according to FPN and FBXL5 mRNA expression level

| Variable                            | No. of cases<br>(n=534) | FPN mRNA level      |                    |         | FBXL5 mRNA level    |                    |         |
|-------------------------------------|-------------------------|---------------------|--------------------|---------|---------------------|--------------------|---------|
|                                     |                         | High (%)<br>(n=267) | Low (%)<br>(n=267) | p-value | High (%)<br>(n=267) | Low (%)<br>(n=267) | p-value |
| Age (yr)                            |                         | 60.3±11.9           | 61.0±12.4          | 0.501   | 61.1±12.2           | 60.2±12.1          | 0.398   |
| Sex                                 |                         |                     |                    |         |                     |                    |         |
| Female                              | 188                     | 100 (37.5)          | 88 (33.0)          | 0.277   | 112 (41.9)          | 76 (28.5)          | 0.001   |
| Male                                | 346                     | 167 (62.5)          | 179 (67.0)         |         | 155 (58.1)          | 191 (71.5)         |         |
| Nuclear grade <sup>a)</sup>         |                         |                     |                    |         |                     |                    |         |
| 1 and 2                             | 243                     | 133 (50.4)          | 110 (42.0)         | 0.054   | 137 (51.9)          | 106 (40.5)         | 0.009   |
| 3 and 4                             | 283                     | 131 (49.6)          | 152 (58.0)         |         | 127 (48.1)          | 156 (59.5)         |         |
| Pathologic T stage                  |                         |                     |                    |         |                     |                    |         |
| pT1 and pT2                         | 343                     | 190 (71.2)          | 153 (57.3)         | 0.001   | 194 (72.7)          | 149 (55.8)         | < 0.001 |
| pT3                                 | 180                     | 75 (28.1)           | 105 (39.3)         |         | 72 (27.0)           | 108 (40.4)         |         |
| pT4                                 | 11                      | 2 (0.7)             | 9 (3.4)            |         | 1 (0.3)             | 10 (3.8)           |         |
| Recurrence/Metastasis <sup>b)</sup> |                         |                     |                    |         |                     |                    |         |
| Absent                              | 309                     | 172 (76.4)          | 137 (64.9)         | 0.008   | 180 (78.6)          | 129 (62.3)         | < 0.001 |
| Present                             | 127                     | 53 (23.6)           | 74 (35.1)          |         | 49 (21.4)           | 78 (33.7)          |         |
| Survival                            |                         |                     |                    |         |                     |                    |         |
| Alive                               | 359                     | 196 (73.4)          | 163 (61.0)         | 0.002   | 205 (76.8)          | 154 (57.7)         | < 0.001 |
| Expired                             | 175                     | 71 (26.6)           | 104 (39.0)         |         | 62 (23.2)           | 113 (42.3)         |         |

FBXL5, F-Box and leucine rich repeat protein 5; FPN, ferroportin; KIRC, Kidney renal clear cell carcinoma; TCGA, The Cancer Genome

Atlas. <sup>a)</sup>Nuclear grade was available in 526 cases, <sup>b)</sup>Follow-up data for recurrence or metastasis was available in 436 patients.
