# Supplementary material for: Ferroportin and FBXL5 as Prognostic Markers in Advanced Stage Clear Cell Renal Cell Carcinoma
Source: PubMed Central journal article supplement — Cancer Res Treat. 2021 Mar 17;53(4):1174–83. doi: 10.4143/crt.2021.031 (PMC8524006; doi:10.4143/crt.2021.031), 2021-03-17
Supplement: crt-2021-031_S4_Fig.pdf [file crt-2021-031_S4_Fig.pdf]

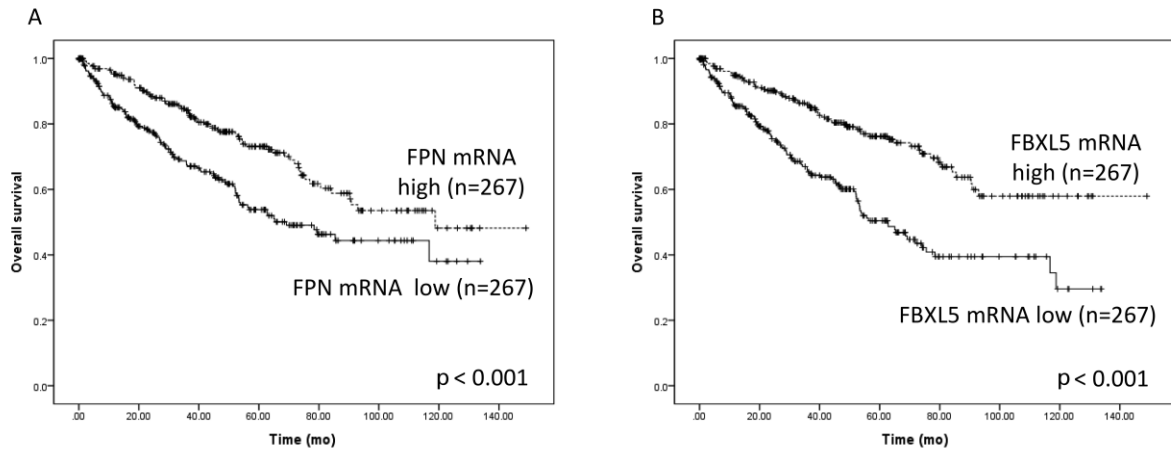

**S4 Fig.** Overall survival of clear cell renal cell carcinoma (RCC) patients according to ferroportin (FPN) and F-Box and leucine rich repeat protein 5 (FBXL5) mRNA level in The Cancer Genome Atlas cohort. (A) Low mRNA expression level of FPN was significantly associated with shorter overall survival ( $p < 0.001$ ). (B) Similar to FPN, a low mRNA expression level of FBXL5 was significantly associated with shorter overall survival ( $p < 0.001$ ).
