# Supplementary material for: Ferroportin and FBXL5 as Prognostic Markers in Advanced Stage Clear Cell Renal Cell Carcinoma
Source: PubMed Central journal article supplement — Cancer Res Treat. 2021 Mar 17;53(4):1174–83. doi: 10.4143/crt.2021.031 (PMC8524006; doi:10.4143/crt.2021.031), 2021-03-17
Supplement: crt-2021-031_S5_Table.pdf [file crt-2021-031_S5_Table.pdf]

**S5 Table.** Univariate and multivariate analysis of 534 cases of TCGA KIRC cohort on overall survival

| Variable                            | Univariate                |         | Multivariate             |         |
|-------------------------------------|---------------------------|---------|--------------------------|---------|
|                                     | HR (95% CI)               | p-value | HR (95% CI)              | p-value |
| Age (yr)                            |                           |         |                          |         |
| ≤ 60                                | 1                         |         | 1                        |         |
| > 60                                | 1.740 (1.289-2.349)       | < 0.001 | 1.163 (0.737-1.834)      | 0.517   |
| Sex                                 |                           |         |                          |         |
| Female                              | 1                         |         | -                        |         |
| Male                                | 0.955 (0.704-1.297)       | 0.770   | -                        | -       |
| Nuclear grade                       |                           |         |                          |         |
| 1 and 2                             | 1                         |         | 1                        |         |
| 3 and 4                             | 2.658 (1.894-3.731)       | < 0.001 | 1.570 (0.836-2.949)      | 0.161   |
| Pathologic T stage                  |                           |         |                          |         |
| pT1 and pT2                         | 1                         |         | 1                        |         |
| pT3                                 | 3.022 (2.223-4.109)       | < 0.001 | 1.859 (1.084-3.187)      | 0.024   |
| pT4                                 | 9.557 (4.911-18.597)      | < 0.001 | 2.778 (0.621-12.426)     | 0.181   |
| FPN mRNA level                      |                           |         |                          |         |
| High                                | 1                         |         | 1                        |         |
| Low                                 | 1.787 (1.321-2.418)       | < 0.001 | 1.534 (0.943-2.495)      | 0.085   |
| FBXL5 mRNA level                    |                           |         |                          |         |
| High                                | 1                         |         | 1                        |         |
| Low                                 | 2.304 (1.688-3.143)       | < 0.001 | 1.820 (1.099-3.015)      | 0.020   |
| Recurrence/Metastasis <sup>a)</sup> |                           |         |                          |         |
| Absent                              | 1                         |         | 1                        |         |
| Present                             | 185.061 (25.736-1330.749) | < 0.001 | 113.316 (15.587-823.800) | < 0.001 |

CI, confidence interval; FBXL5, F-Box and leucine rich repeat protein 5; FPN, ferroportin; HR, hazard ratio; KIRC, Kidney renal clear cell carcinoma; TCGA, The Cancer Genome Atlas. <sup>a)</sup>Follow-up data for recurrence or metastasis was available in 436 patients.
