# Supplementary material for: Ferroportin and FBXL5 as Prognostic Markers in Advanced Stage Clear Cell Renal Cell Carcinoma
Source: PubMed Central journal article supplement — Cancer Res Treat. 2021 Mar 17;53(4):1174–83. doi: 10.4143/crt.2021.031 (PMC8524006; doi:10.4143/crt.2021.031), 2021-03-17
Supplement: crt-2021-031_S6_Fig.pdf [file crt-2021-031_S6_Fig.pdf]

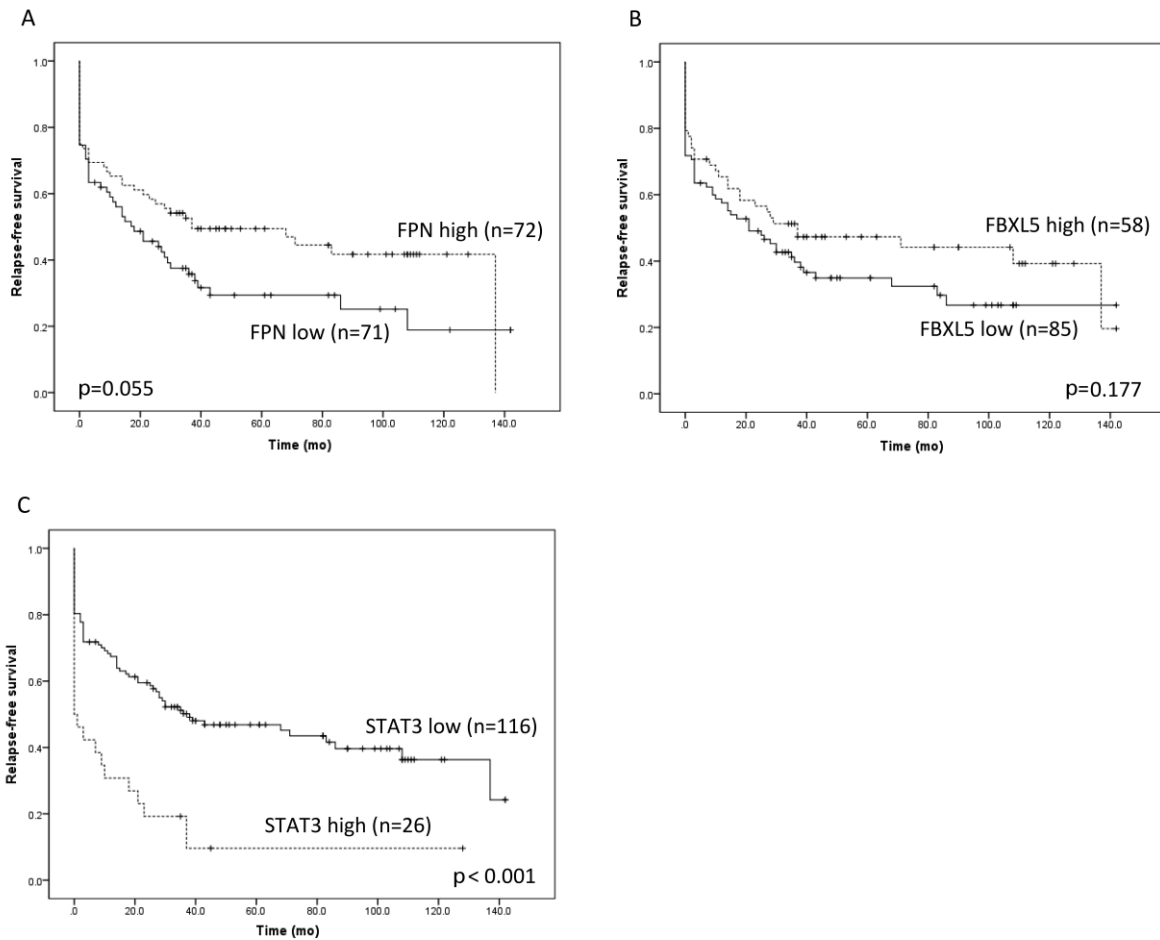

**S6 Fig.** Relapse-free survival of clear cell renal cell carcinoma (RCC) patients according to ferroportin (FPN), F-Box, and leucine rich repeat protein 5 (FBXL5) and signal transducer and activator of transcription 3 (STAT3) expression. (A) In 143 clear cell renal cell carcinoma, low expression of FPN showed a tendency toward shorter relapse-free survival ( $p=0.055$ ). (B) No significant difference in relapse-free survival according to FBXL5 expression was observed ( $p=0.177$ ). (C) High STAT3 expression showed significantly shorter relapse-free survival ( $p < 0.001$ ).
