# Supplementary material for: Ferroportin and FBXL5 as Prognostic Markers in Advanced Stage Clear Cell Renal Cell Carcinoma
Source: PubMed Central journal article supplement — Cancer Res Treat. 2021 Mar 17;53(4):1174–83. doi: 10.4143/crt.2021.031 (PMC8524006; doi:10.4143/crt.2021.031), 2021-03-17
Supplement: crt-2021-031_S9_Table.pdf [file crt-2021-031_S9_Table.pdf]

**S9 Table.** Univariate and multivariate analysis of 436 cases of TCGA KIRC cohort on relapse-free survival <sup>a)</sup>

| Variable           | Univariate            |         | Multivariate         |         |
|--------------------|-----------------------|---------|----------------------|---------|
|                    | HR (95% CI)           | p-value | HR (95% CI)          | p-value |
| Age (yr)           |                       |         |                      |         |
| ≤ 60               | 1                     |         | 1                    |         |
| > 60               | 1.478 (1.043-2.093)   | 0.028   | 1.306 (0.915-1.863)  | 0.141   |
| Sex                |                       |         |                      |         |
| Female             | 1                     |         | -                    |         |
| Male               | 1.423 (0.963-2.101)   | 0.077   | -                    | -       |
| Nuclear grade      |                       |         |                      |         |
| 1 and 2            | 1                     |         | 1                    |         |
| 3 and 4            | 3.368 (2.148-5.279)   | < 0.001 | 2.399 (1.568-3.670)  | < 0.001 |
| Pathologic T stage |                       |         |                      |         |
| pT1 and pT2        | 1                     |         | 1                    |         |
| pT3                | 4.434 (3.082-6.379)   | < 0.001 | 3.219 (2.197-4.718)  | < 0.001 |
| pT4                | 13.374 (4.113-43.489) | < 0.001 | 8.395 (2.520-27.965) | < 0.001 |
| FPN mRNA level     |                       |         |                      |         |
| High               | 1                     |         | 1                    |         |
| Low                | 1.721 (1.209-2.450)   | 0.003   | 1.395 (0.955-2.037)  | 0.085   |
| FBXL5 mRNA level   |                       |         |                      |         |
| High               | 1                     |         | 1                    |         |
| Low                | 2.178 (1.522-3.118)   | < 0.001 | 1.725 (1.166-2.551)  | 0.006   |

CI, confidence interval; FBXL5, F-Box and leucine rich repeat protein 5; FPN, ferroportin; HR, hazard ratio; KIRC, kidney renal clear cell carcinoma; TCGA, The Cancer Genome Atlas.

<sup>a)</sup>Data about recurrence or distant metastasis were available in 436 patients.
